# Supplementary material for: Population Size Predicts Lexical Diversity, but so Does the Mean Sea Level – Why It Is Important to Correctly Account for the Structure of Temporal Data
Source: PLoS One. 2016 Mar 3;11(3):e0150771. doi: 10.1371/journal.pone.0150771 (PMC4777502; doi:10.1371/journal.pone.0150771)
Supplement: S1 File — (XLSX) [file pone.0150771.s001.xlsx]

## Sheet: Tabelle1
	country	source: http://www.populstat.info/ last accessed 14/07/2015. population figures are divided by 100
year	pop_chisim	pop_enggb	pop_engus	pop_fre	pop_ger	pop_ita	pop_rus	pop_spa
1900	400000	354059	762122	389000	563562	324750	711620	18594
1901	402243	375181	775840	389800	568700	320454	725420	18618.1
1902	404498	375289	791630	390500	577700	325956	739320	18723
1903	406765	379575	806320	391200	586300	329612	753420	18736.9
1904	409046	383911	821660	391900	594700	332183	767620	18984
1905	411339	388295	838220	392200	606415	334761	781820	19116
1906	413645	392731	854500	392700	611500	337332	796120	19249
1907	415964	397217	870080	392700	620100	336407	810520	19383
1908	418297	401754	887100	393700	628600	339098	825020	19565.9
1909	420642	406342	904900	394300	637200	342698	839620	19712.6
1910	423000	405336	922285	395400	649260	345652	854320	19927.2
1911	427662	411260	938630	396200	653600	351318	869120	20090.6
1912	432375	411235	953350	396700	661500	352692	884020	20231.2
1913	437140	413344	972250	397700	669800	352390	899020	20372.7
1914	441958	417079	991110	332200	671800	355978	915000	20515.2
1915	446829	401297	1005460	333800	678490	361201	930000	20658.7
1916	451753	392947	1019610	328500	675800	365464	920000	20803.2
1917	456732	385213	1032680	325000	671550	366024	910000	20948.7
1918	461766	382870	1032080	328300	645650	365829	900000	21095.3
1919	466855	416201	1045140	319700	603247	363700	890000	21242.8
1920	472000	423884	1060216	390000	621260	378370	880000	21303.2
1921	473673	437165	1085380	392400	606258	387560	870000	21502.8
1922	475352	443315	1100490	394200	611854	387900	877550	21658.2
1923	477037	445631	1119470	398800	615773	391360	899000	21763.1
1924	478728	448856	1141090	403100	619524	394010	910000	21966.6
1925	480425	450400	1158290	406100	633630	396930	922000	22127.7
1926	482128	452196	1173970	408700	628659	395846	934590	22290.2
1927	483837	454330	1190350	409400	632523	396810	945900	22444.2
1928	485552	455800	1205090	410500	643900	400540	957340	23093
1929	487273	456700	1217700	412300	647400	404450	968930	23327
1930	489000	458700	1232027	416100	653000	407030	980650	23563.9
1931	492095	449374	1241490	418600	654200	411767	992520	23786
1932	495209	463300	1249490	418600	657200	415800	1004530	24010
1933	498343	462500	1256900	418900	660316	419300	1016690	24236
1934	501497	466600	1264850	419500	664100	418060	1028990	24464
1935	504671	468700	1273620	419400	668700	422170	1041440	24583.1
1936	507864	464600	1281810	419100	673500	424446	1054040	24926
1937	511078	472900	1289610	419300	678300	435780	1066800	25161
1938	514313	474900	1299690	419600	680720	438430	1079700	25398
1939	517568	477600	1310280	400000	696225	443940	1083770	25637
1940	520843	482200	1321651	390000	707470	437870	1100980	25878
1941	524139	482200	1334020	378000	719167	448300	1115000	26084
1942	527456	484000	1348600	377000	726200	453870	1120000	26291
1943	530795	487900	1367390	370800	714000	448300	1100000	26500
1944	534154	490200	1383970	365000	705390	449400	1080000	26710
1945	537534	491900	1399280	380000	696770	454150	1060000	26922
1946	540936	492200	1413890	403200	688170	453800	1050000	27136
1947	544359	495200	1441260	407400	679560	457200	1040000	27552.5
1948	547804	500260	1466310	412100	673650	463810	1030000	27593
1949	541670	503240	1491880	416000	680800	467330	1020000	27811
1950	556613	506160	1513258	418290	683770	471040	1014380	28009
1951	563000	505620	1542870	420340	688790	474170	1039070	28236
1952	574820	507230	1569540	423240	691870	476660	1057420	28474
1953	587960	508620	1595650	426680	695280	479570	1076340	28713
1954	602660	510460	1623910	430400	699390	482990	1095320	28955
1955	614479	511990	1652750	434280	703260	486330	1114020	29199
1956	627393	514060	1682210	438250	707240	489200	1132180	29445
1957	640629	516320	1712740	442360	711740	491810	1149730	29693
1958	654159	518420	1741410	446730	716470	494750	1166660	29943
1959	667964	521280	1770730	451500	721740	500255	1175340	30195
1960	682024	523720	1793232	456840	726740	503739	1190458	30776.9
1961	658590	528160	1836910	462770	733000	505230	1207656	31066
1962	672950	533410	1865380	469170	739390	508430	1220000	31393
1963	691720	536780	1892420	475720	745440	511980	1233000	31723
1964	704990	540660	1918890	481960	749630	519068	1247000	32056
1965	754452	544360	1943030	487580	756470	523179	1263091	32262.3
1966	768880	547440	1965600	492430	762140	523320	1271891	32734
1967	783191	550680	1987120	496610	763680	526670	1268170	33079
1968	797416	552820	2007060	500340	765840	529870	1280000	33427
1969	811613	555340	2026770	503960	771340	536853	1290000	33779
1970	825812	554160	2032119	507720	777090	539584	1300792	34041.5
1971	840028	556060	2076610	511710	783410	540050	1307044	34494
1972	854209	557850	2098960	515810	787400	544110	1314370	34858
1973	868245	559130	2119090	519880	789670	549120	1321890	35225
1974	881989	559320	2138540	523660	789960	552930	1329000	35596
1975	908266	558900	2159730	526990	786970	555890	1337449	35723.4
1976	933032	558850	2180350	529830	783600	561680	1346901	35971
1977	952000	558520	2202390	532280	781840	564610	1356000	36351
1978	956200	558220	2225850	534460	781060	566970	1365000	36775
1979	969000	562849	2250550	536580	781260	563885	1375520	37200
1980	981200	563410	2265458	538800	782750	564793	1382914	37636.2
1981	993900	563290	2301380	541150	783990	565413	1390278	37876.6
1982	1008600	563266	2325200	543600	782930	566158	1398162	38083.6
1983	1023300	564413	2347990	546180	780810	566359	1407659	38260.5
1984	1036800	565955	2370010	548880	777960	566675	1414824	38423
1985	1051438	567685	2392790	551700	776190	566810	1428226	38586.4
1986	1066800	569302	2416250	554670	776350	566696	1438352	38666.7
1987	1084628	570835	2439420	557760	777180	566780	1451149	38765.9
1988	1102168	572580	2463070	560920	781160	566975	1463433	38851.9
1989	1119186	574593	2473420	564080	786770	567119	1473860	38924.5
1990	1.13368e+06	576810	2487099	567180	802742	567627	1480407	38993.8
1991	1149608	578996	2526430	570190	802746	567572	1485427	39055.9
1992	1162980	580915	2554070	573110	802746	569603	1487043	39114.2
1993	1175537	582770	2581200	575910	809746	572450	1486730	39117
1994	1187831	580880	2605290	578560	811410	571540	1483660	39143.4
1995	1200241	585330	2631190	581040	818690	572040	1482490	39199
1996	1215414	587820	2652840	583750	819120	573800	1477390	39260
1997	1227177	590090	2676360	586100	820710	575230	1473070	39323
1998	1238599	590550	2702990	588470	820470	575890	1469090	39371
1999	1253595	595010	2755627	585129	821000	576460	1462000	39683
2000	1265830	595115	2814219	593297	827974	576343	1460012	39996.7
